# Supplementary material
Source: PubMed Central journal article supplement (PMC2072067)

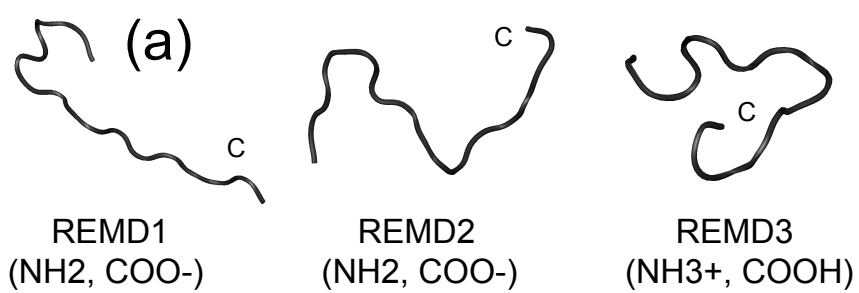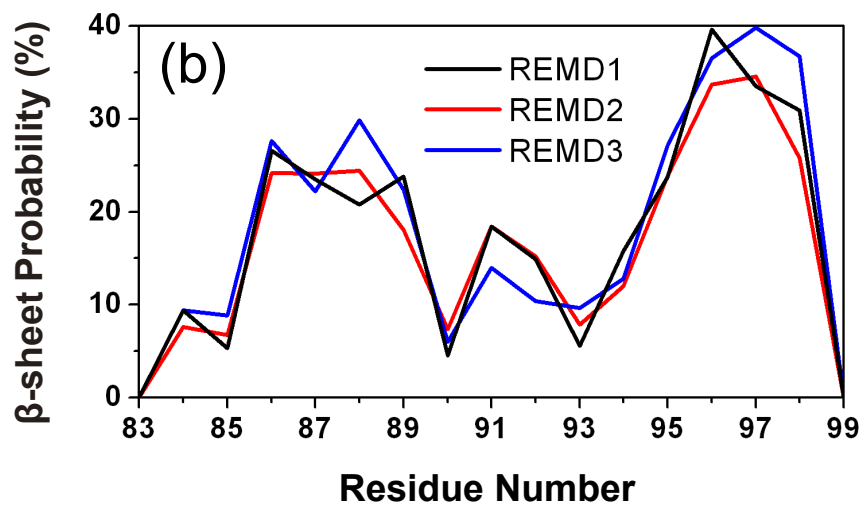

**Figure s1**

Supplement: biophysj_107.105585_1.pdf [file biophysj_107.105585_1.pdf]

### (a) NH<sub>2</sub>, COO<sup>-</sup>

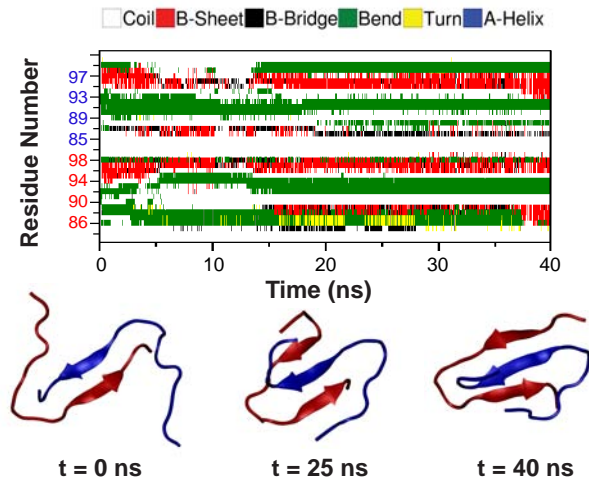

### (b) NH<sub>3</sub><sup>+</sup>, COOH

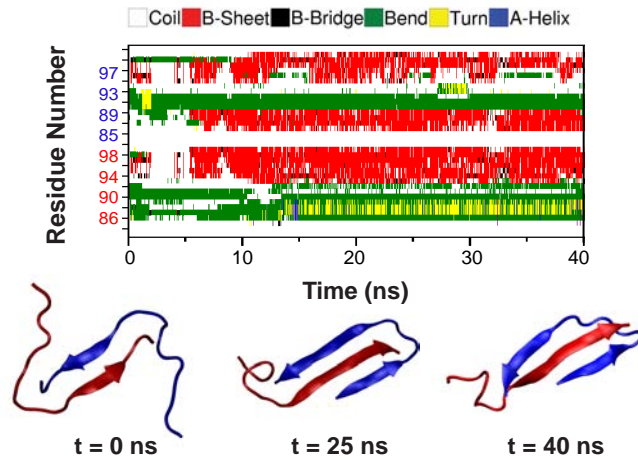

### (c) NH<sub>3</sub><sup>+</sup>, COOH

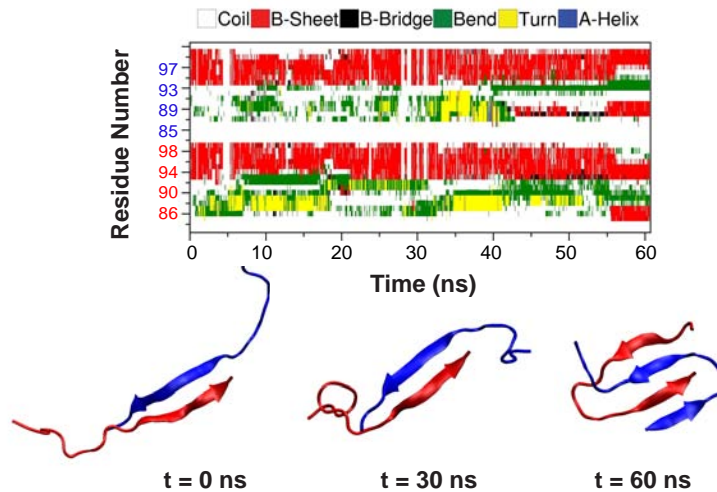

Figure s2

Supplement: biophysj_107.105585_2.pdf [file biophysj_107.105585_2.pdf]
